# Supplementary material for: CNT-based bifacial perovskite solar cells toward highly efficient 4-terminal tandem photovoltaics
Source: Royal Society of Chemistry journal article supplement (doi:10.1039/d1ee04008a), 2022-01-01
Supplement: d1ee04008a1.pdf [file d1ee04008a1.pdf]

## Supporting Information

### CNT-based bifacial perovskite solar cells toward highly efficient 4-terminal tandem photovoltaics

Chunyang Zhang,<sup>a,b</sup> Min Chen,<sup>c</sup> Fan Fu<sup>d</sup>, Hongwei Zhu<sup>b</sup>, Thomas Feurer<sup>d</sup>, Wenming Tian,<sup>e</sup> Chao Zhu,<sup>f</sup> Ke Zhou,<sup>g</sup> Shengye Jin,<sup>e</sup> Shaik Mohammed Zakeeruddin,<sup>b</sup> Ayodhya N. Tiwari,<sup>d</sup> Nitin P. Padture,<sup>c</sup> Michael Grätzel<sup>b,\*</sup> and Yantao Shi<sup>a,\*</sup>

#### Materials and Methods

##### Materials

CsI (99.999%), 4-tert-butylpyridine (96%), bis(trifluoromethane)sulfonimide lithium salt (99.95%), isopropanol (99.5%), acetonitrile (99.8%), chlorobenzene (99.8%), dimethyl sulfoxide (99.9%), diethyl sulfide (98%), CuSCN (99%), dimethylformamide (99.8%),  $\alpha, \alpha, \alpha$ -Trifluorotoluene ( $\geq 99\%$ ), were purchased from Sigma Aldrich. SnCl<sub>2</sub> 2H<sub>2</sub>O (98%) was purchased from Alfa Aesar. CH<sub>3</sub>NH<sub>3</sub>Br and CH(NH<sub>2</sub>)<sub>2</sub>I were received from Xi'an Polymer Light Technology Corp. PbI<sub>2</sub> (99.99%), PbBr<sub>2</sub> (>98.0%) were purchased from TCI company. Spiro-OMeTAD (99.7%) was obtained from Lumtec. Ethanol ( $\geq 99.7$ ) bought from Sinopharm Chemical Reagent Co., Ltd. Acetone ( $\geq 99.5\%$ ) were purchased from Adamas. The MWCNT/1 (XFQ046), MWCNT/2 (XFM01) and SWCNT (XFS22) was ordered from Nanjing XFNANO Materials Tech Co., Ltd. FTO (10  $\Omega$  sq-1) and ITO was obtained from Nippon Sheet Glass.

##### Fabrication of modular C-PSCs

10 mg of carbon nanotube materials were dispersed into 2.5 ml of isopropanol solution, followed by the ball-milling process for 12 h. Thus, the dispersion slurry for spraying was prepared. FTO glasses were firstly etched with zinc powder and 4 M HCl solution, rinsed with cleaning fluid, deionized water, ethanol, acetone and isopropanol, respectively. The 0.1 M SnCl<sub>2</sub> 2H<sub>2</sub>O isopropanol solution was refluxed at 85 °C for 3 h to obtain the SnO<sub>2</sub> sol for electron extraction layer (ETL) of PSCs. The prepared SnO<sub>2</sub> precursor was directly spin-coated on the FTO glass at 2000 rpm for 30 s, annealing at 80 °C for 1 h in the air. After annealing, the deposited SnO<sub>2</sub> ETL was treated with continuous UV-Ozone for 20 min. To deposit the perovskite layer, one-step spin-coating method was adopted to prepare the Cs<sub>0.05</sub>FA<sub>0.85</sub>MA<sub>0.10</sub>Pb(I<sub>0.97</sub>Br<sub>0.03</sub>)<sub>3</sub> perovskite layer with 5% excess of PbI<sub>2</sub> in 1 ml of mixed solvent of DMF and DMSO (4:1 volume ratio), and then stirred at 60 °C for 2 h. Next, 1 M CsI in DMSO solution was added to the above perovskite precursor solution with a volume ratio of 5:95. Subsequently, 120  $\mu$ L of perovskite solution was spin coated on the prepared ETL-covered substrate via a two-step spin coating program with first 1000 rpm for 10 s and then 6000 rpm for 30 s, respectively. 300  $\mu$ L of anti-solvent ( $\alpha, \alpha, \alpha$ -Trifluorotoluene) was dropped on the spinning substrates 20 s prior the end of program, then annealing at 85 °C for 45 min. The HTL precursor solution was obtained via adding 72.3 mg of spiro-OMeTAD powder, 29  $\mu$ L of 4-tert-butylpyridine, 17.5  $\mu$ L of bis(trifluoromethane)sulfonimide lithium salt acetonitrile solution (520 mg/mL) into chlorobenzene (1 mL) or dissolving 35 mg CuSCN salt in 1 mL of diethyl sulfide. Afterward, 35  $\mu$ L of the HTL precursor solution was spin coated on the prepared perovskite films at 5000 rpm for 30 s. The semi-cell was obtained successfully. Then 100  $\mu$ L of carbon slurry based on CNT was sprayed on the semi-cells and another TCO substrates (ITO or FTO) which were fixed with tape on a hotplate at 85 °C to accelerate the solvent evaporation, respectively. Thus, the semi-cell A and the charge collector B were obtained, respectively. Finally, the modular C-PSC was assembled through stacking semi-cell A and charge collector B together through two clips (mechanical pressure applied is around 4.7 kPa). The assembly pressure required is low because carbon layers are pre-deposited on the semi-cell A and charge collector B, which constructs two important interface contact (spiro-

OMeTAD/CNT and TCO/CNT) in advance. Thus, the semi-cell A and charge collector B can form good contact to enable fluent charge transfer under small mechanical pressure.

#### Fabrication of CuInSe<sub>2</sub> (CIS) cell

The CIS cell was grown through multi-stage co-evaporation onto a Mo coated soda-lime glass substrate. In this process, the constituent metals were co-deposited in a vacuum chamber, at a substrate temperature of maximal 500 °C, leading to the formation of slightly sub-stoichiometric CIS. The absorber was then treated in-situ with NaF and RbF in a Se atmosphere. A detailed description of the growth process is given in Ref. <sup>1</sup>. A subsequent CdS buffer layer of approximately 35 nm was deposited by the chemical bath deposition. In addition, 70 nm non-intentionally doped ZnO was deposited by RF magnetron sputtering. The front contact was realized by sputtering IZO (In<sub>2</sub>O<sub>3</sub>:ZnO, 89.3:10.7 wt%) in pulsed DC mode, followed by a Ni/Al current collection grid and a 105 nm MgF<sub>2</sub> anti-reflection coating by e-beam evaporation.

#### Characterizations

The morphologies characterizations of samples were conducted by scanning electron microscopy (SEM, SU8220, JAPAN) and transmission electron microscope (TEM, F-20, FEI, Netherlands). *J-V* characteristics of modular C-PSCs were performed on Keithley 2450 at the scan speed of 50 mV s<sup>-1</sup>. The simulated AM 1.5G sunlight (irradiance equivalent to 100 mW cm<sup>-2</sup>) calibrated by standards Si reference cell (Si photodiode (FDS1010-CAL from Thorlabs) with KG5 filter, calibrated by Newport.) was generated through a solar simulator (Newport Sol 3A). The modular C-PSCs were masked by a black metal mask with an aperture area of 0.09 cm<sup>2</sup> during photovoltaic performance measurement. The stable PCE were conducted by a digital source meter (Keithley 2450) at maximum power point. The EQE spectra was measured through a commercial apparatus (Aequeo-Ariadne, Cicci Research s.r.l.) with a 300 W Xenon lamp. The PL map was tested by a photoluminescence (PL)-scanned imaging microscope coupled with a time-correlated single photon counting (TCSPC) module. The sample was excited by a 450 nm, 1 MHz repetition rate and ~6 ps pulse width white-light laser (SC400-PP, Fianium, UK). The PL signals were recorded by a high-speed detector (HPM-100-40, Hamamatsu, Japan) equipped with a 710 nm long pass filter and 747 ± 16.5 nm band pass filter. Stability of the cells were tested under a white LED lamp equipped with biologic MPG2 potentiostat and N<sub>2</sub> atmosphere. The spectral mismatch between AM 1.5G and the simulated sunlight was calibrated through a Schott K113 Tempax filter.

The following formula and description of nomenclatures are supplements and explanation of relevant formulas in the main article.

$$pFF = \frac{V_{oc}^N - \ln(V_{oc}^N - 0.72)}{(V_{oc}^N + 1)}$$

$$V_{oc}^N = \frac{q}{nkt} V_{oc}$$

$$R_{Isc} = 1 + \frac{I_{sc-r}}{I_{sc-f}} x$$

$$I_0 = \frac{I_{sc-f}}{\exp\left(\frac{qV_{oc-f}}{nkT}\right)}$$

| Symbol      | Description                                                                   | Unit |
|-------------|-------------------------------------------------------------------------------|------|
| $\eta_f$    | PCE of the cell for front-side illumination at standard test conditions (STC) | %    |
| $\eta_{bi}$ | Equivalent bifacial-PCE                                                       | %    |
| $I_{sc-f}$  | Short-circuit current of the cell under front-side illumination at STC        | A    |
| $V_{oc-f}$  | Open-circuit voltage of the cell under front-side illumination at STC         | V    |

|             |                                                                       |                    |
|-------------|-----------------------------------------------------------------------|--------------------|
| $FF_f$      | Fill factor of the cell under front-side illumination at STC          | %                  |
| $I_{sc-r}$  | Short-circuit current of the cell under rear-side illumination at STC | A                  |
| $pFF$       | Pseudo fill factor                                                    | %                  |
| $FF_{bi}$   | Effective fill factor of the cell under bifacial operation            | %                  |
| $V_{oc-bi}$ | Effective $V_{oc}$ of the cell under bifacial operation               | V                  |
| $I_{sc-bi}$ | Effective $I_{sc}$ of the cell under bifacial operation               | mA/cm <sup>2</sup> |
| $R_{Isc}$   | Relative current gain                                                 | Dimensionless      |
| $x$         | Rear-side irradiance                                                  | Sun                |
| $I_0$       | Dark saturation current                                               | A                  |

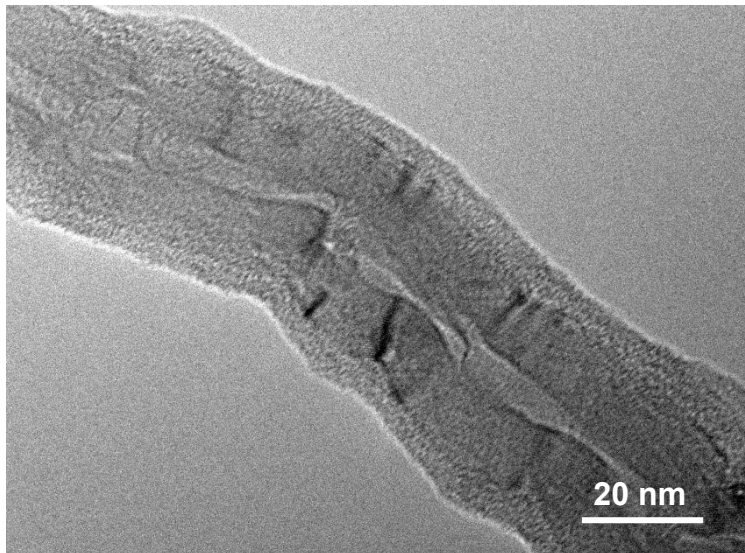

**Fig. S1** TEM image of MWCNT/1.

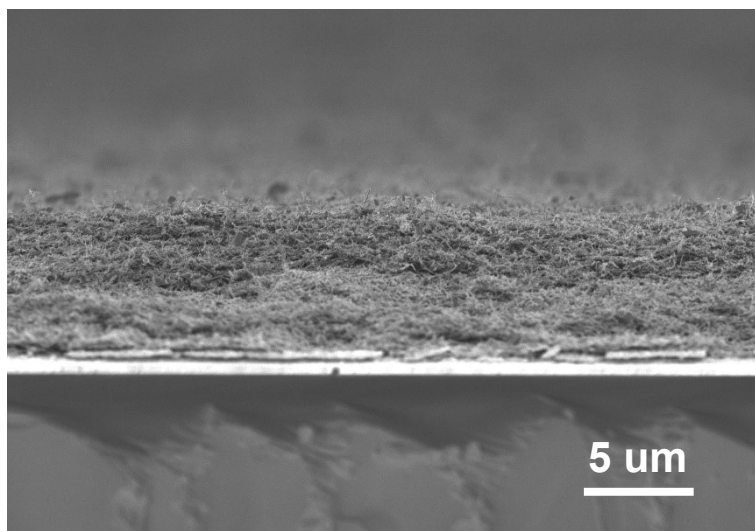

**Fig. S2** Calibration of carbon film thickness. Cross-section SEM image of MWCNT/1 film based on 500  $\mu\text{L}$  carbon slurry sprayed on FTO.

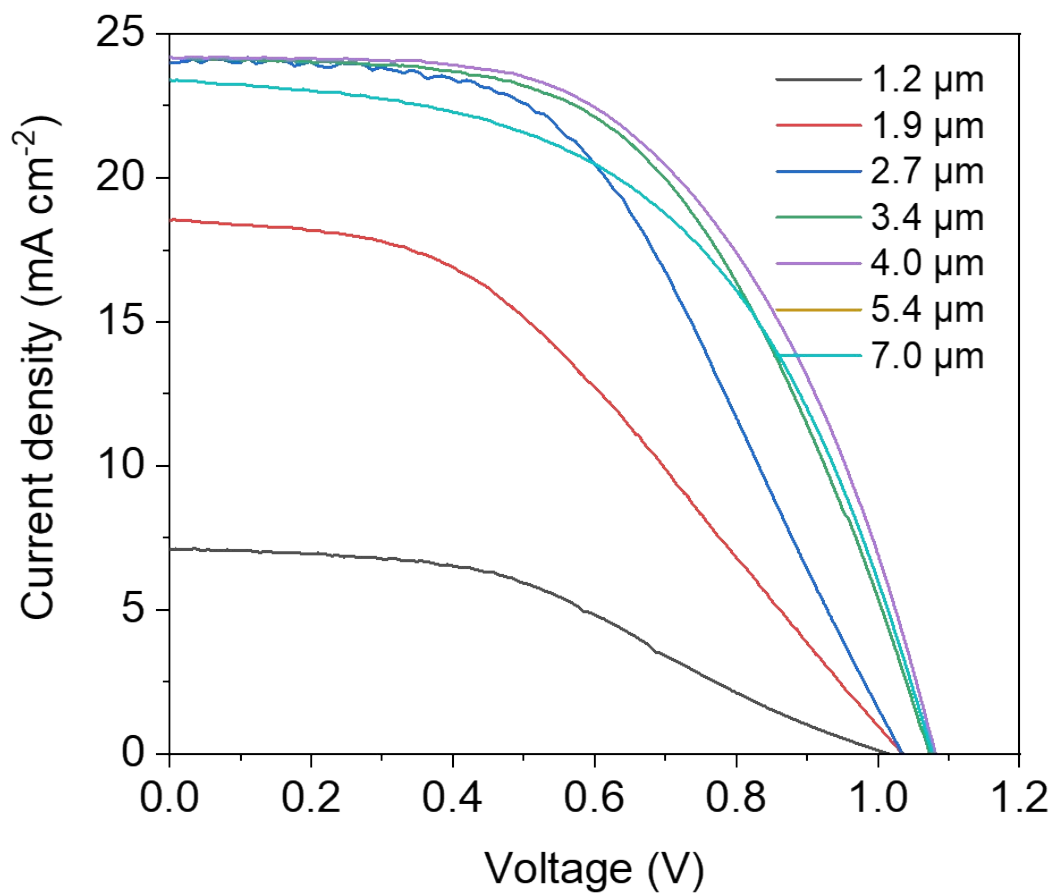

**Fig. S3** The PV performance of MWCNT/1-PSCs without FTO substrate. *J-V* curves of MWCNT/2-PSCs without FTO substrate with different carbon electrode thickness.

**Table S1** The PV performance of MWCNT/1-PSCs without FTO substrate. Photovoltaics parameters of MWCNT/2-PSCs without FTO substrate with different carbon electrode thickness.

| Thickness ( $\mu\text{m}$ ) | $V_{oc}$<br>[V] | $J_{sc}$<br>[ $\text{mA cm}^{-2}$ ] | FF<br>[%] | PCE<br>[%] |
|-----------------------------|-----------------|-------------------------------------|-----------|------------|
| 1.2                         | 1.015           | 7.1                                 | 41.7      | 3.0        |
| 1.9                         | 1.034           | 18.5                                | 40.3      | 7.7        |
| 2.7                         | 1.035           | 24.0                                | 49.7      | 12.3       |
| 3.4                         | 1.074           | 24.2                                | 53.8      | 14.0       |
| 4.0                         | 1.082           | 24.2                                | 54.8      | 14.4       |
| 5.4                         | 1.079           | 24.1                                | 53.2      | 13.9       |
| 7.0                         | 1.077           | 23.4                                | 52.4      | 13.2       |

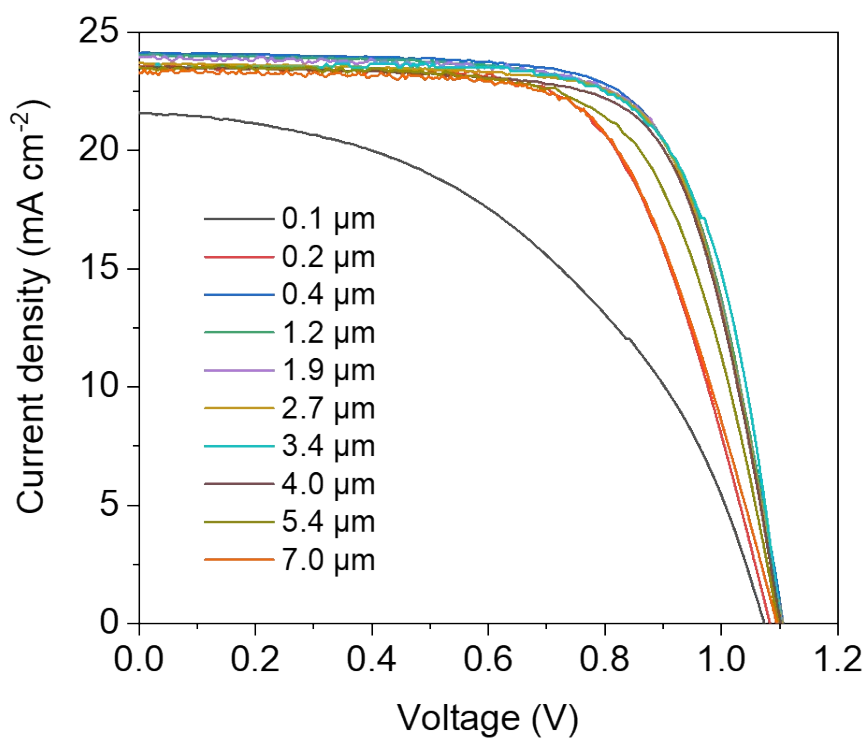

**Fig. S4** The PV performance of MWCNT/1-PSCs with FTO substrate.  $J$ - $V$  curves of MWCNT/2-PSCs with different carbon electrode thickness.

**Table S2** The PV performance of MWCNT/1-PSCs with FTO substrate. Photovoltaics parameters of MWCNT/2-PSCs with different carbon electrode thickness.

| Thickness ( $\mu\text{m}$ ) | $V_{oc}$<br>[V] | $J_{sc}$<br>[ $\text{mA cm}^{-2}$ ] | FF<br>[%] | PCE<br>[%] |
|-----------------------------|-----------------|-------------------------------------|-----------|------------|
| 0.1                         | 1.074           | 21.6                                | 47.0      | 10.9       |
| 0.2                         | 1.084           | 23.5                                | 65.1      | 16.6       |
| 0.4                         | 1.106           | 24.1                                | 70.3      | 18.7       |
| 1.2                         | 1.102           | 24.0                                | 70.2      | 18.6       |
| 1.9                         | 1.104           | 23.9                                | 71.0      | 18.7       |
| 2.7                         | 1.105           | 23.7                                | 71.1      | 18.6       |
| 3.4                         | 1.102           | 23.5                                | 71.5      | 18.5       |
| 4.0                         | 1.102           | 23.6                                | 70.6      | 18.3       |
| 5.4                         | 1.098           | 23.5                                | 67.1      | 17.3       |
| 7.0                         | 1.096           | 23.3                                | 65.2      | 16.6       |

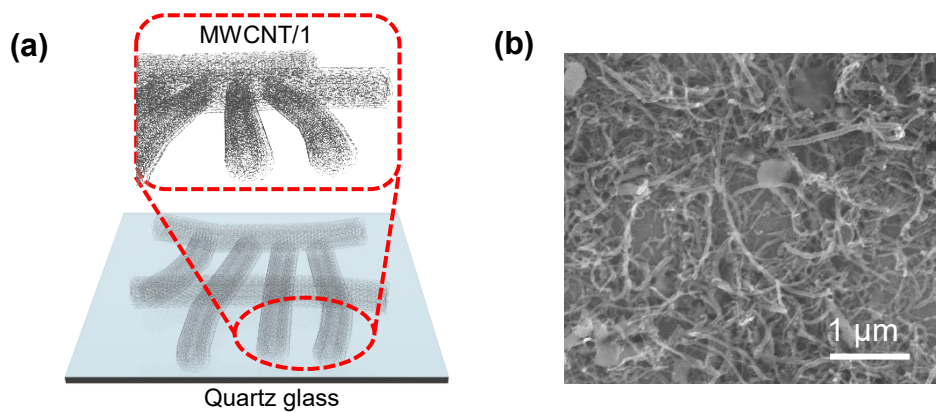

**Fig. S5** Morphology and schematic diagram of MWCNT/1 film on glass. (a and b) The schematic illustration (a) and SEM image (b) of MWCNT/1 film sprayed on glass.

**Table S3** PV performance parameters of MWCNT/1-PSCs illuminated from front side and rear side separately.

|         | $V_{oc}$<br>[V] | $J_{sc}$<br>[mA cm <sup>-2</sup> ] | FF<br>[%] | PCE<br>[%] | Illuminate from |
|---------|-----------------|------------------------------------|-----------|------------|-----------------|
| WMCNT/1 | 1.106           | 24.1                               | 70.3      | 18.7       | Front side      |
|         | 1.016           | 1.1                                | 0.699     | 0.6        | Rear side       |

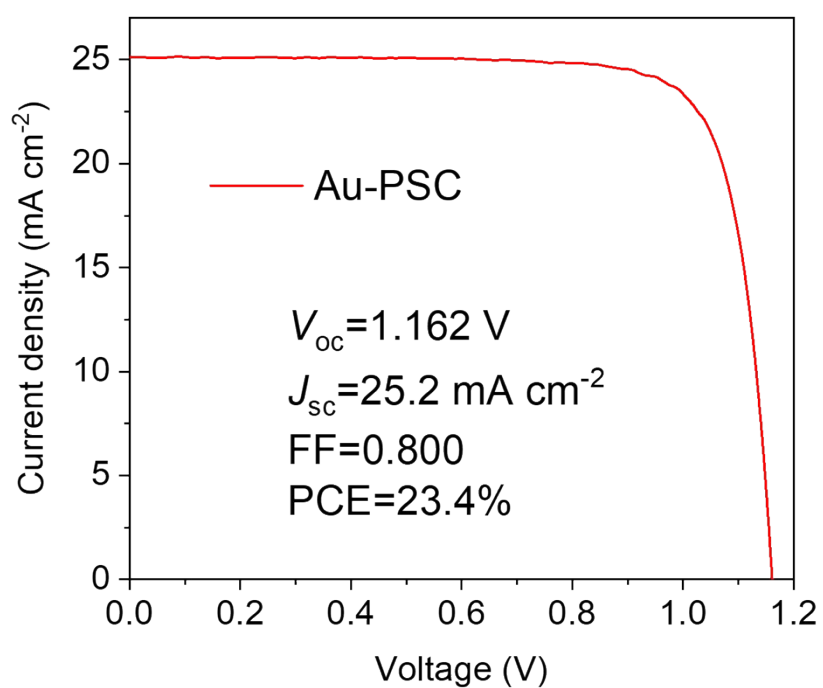

**Fig. S6** The PV performance of Au-PSC whose Au electrode was prepared by thermal-evaporation.

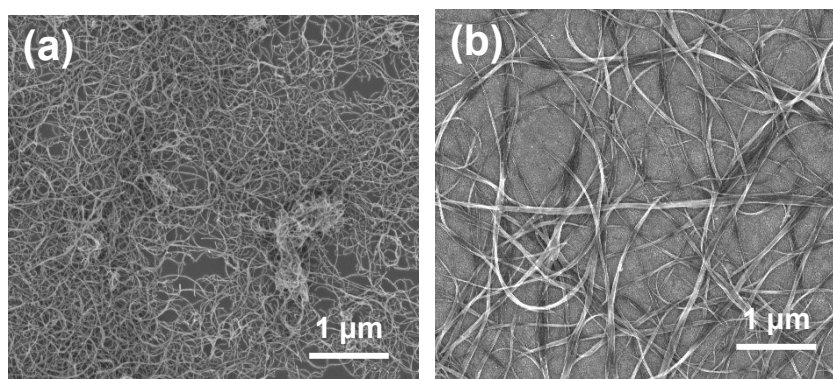

**Fig. S7** (a and b) SEM of MWCNT/2 (a) and SWCNT (b) film sprayed on glass.



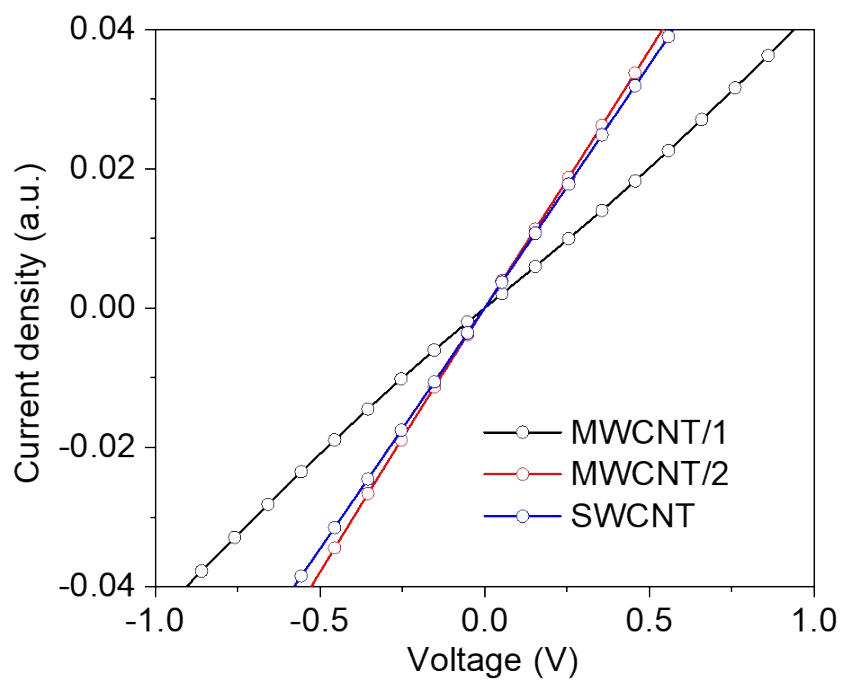

**Fig. S8** Linear sweep voltammetry (LSV) curves of FTO/CNT/FTO based on MWCNT/1, MWCNT/2 and SWCNT, respectively.

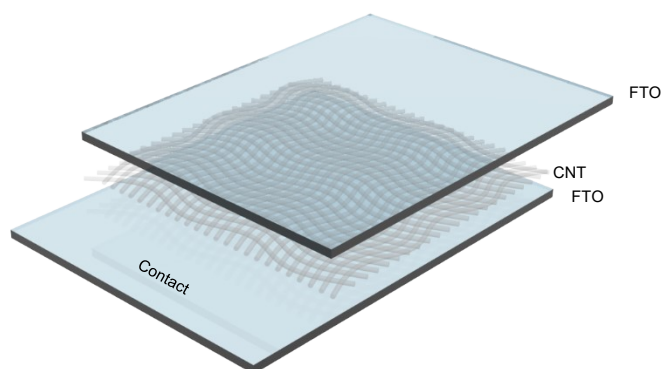

**Fig. S9** The device structure diagram (FTO/CNT/FTO) used for linear sweep voltammetry (LSV) test.

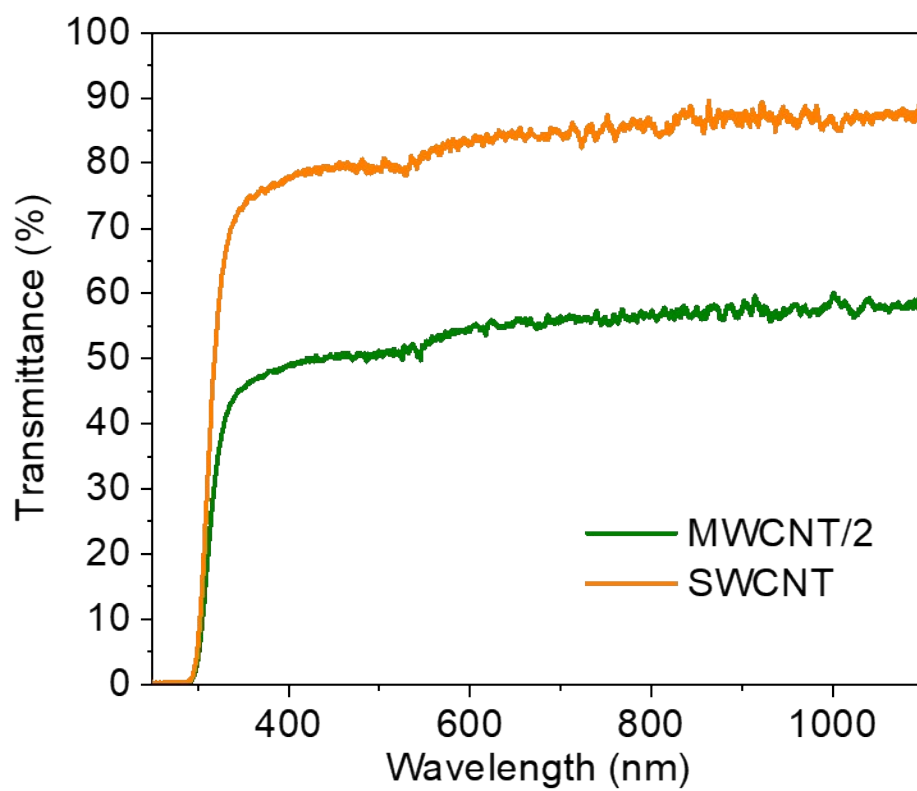

**Fig. S10** Transparency of MWCNT/2 and SWCNT film on glass. UV-Vis transmission spectrum of MWCNT/2 and SWCNT film sprayed on glass.

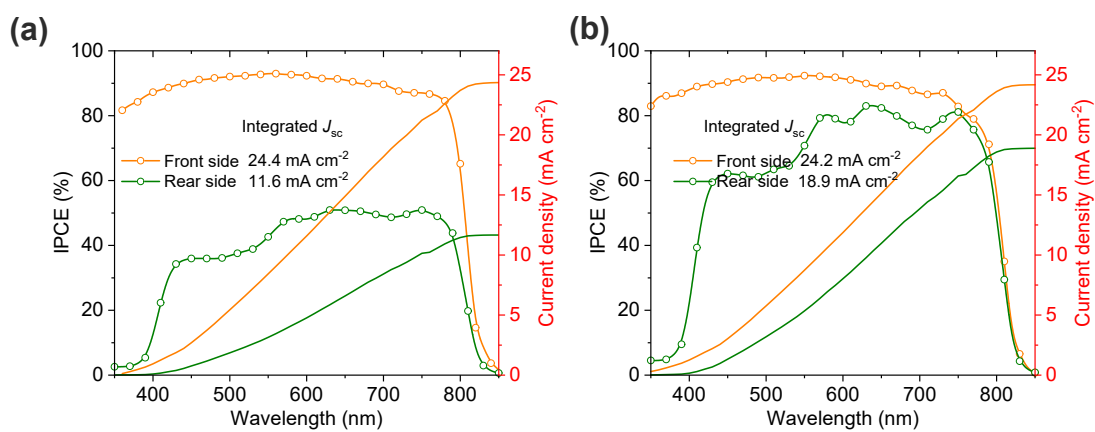

**Fig. S11** (a) EQE and integrated current density curves of MWCNT/2-PSC illuminated from front side and rear side, respectively. (b) EQE and integrated current density curves of SWCNT-PSC illuminated from front side and rear side, respectively.

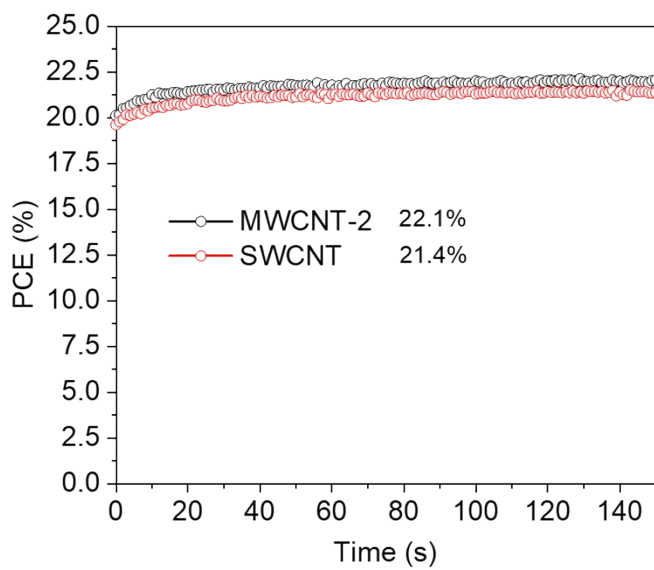

**Fig. S12** Steady-state PCE curves of MWCNT/2-PSC and SWCNT-PSC under AM1.5G 1-sun illumination.

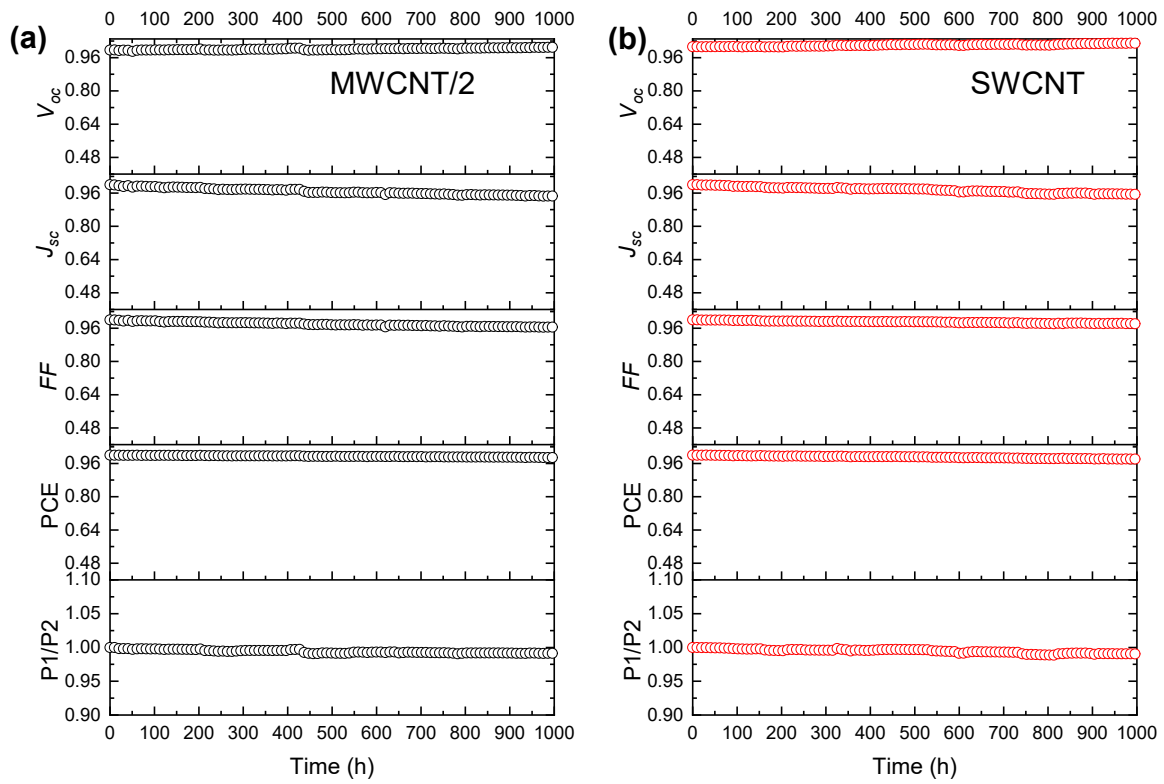

**Fig. S13** (a and b) PV Performance parameter statistics of bifacial CNT-PSC illuminated from front side based on MWCNT/2 (a) and SWCNT (b) electrode.  $V_{oc}$ ,  $J_{sc}$ , FF, PCE and hysteresis (P1/P2) tracking of MWCNT/2-PSC and SWCNT-PSC under  $N_2$  atmosphere, 1-sun continuous illumination (25 °C).

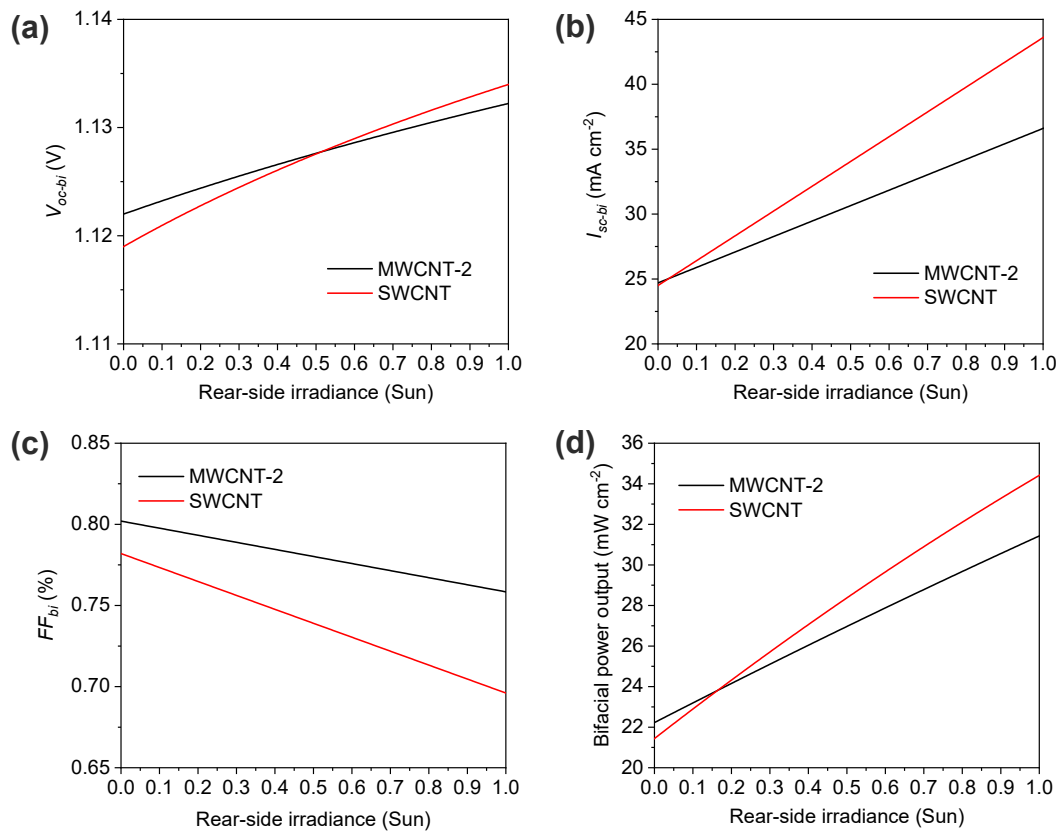

**Fig. S14** (a-d) Theoretical  $V_{oc-bi}$  (a),  $J_{sc-bi}$  (b),  $FF_{bi}$  (c), bifacial power output ( $PO_{bi}$ ) (d) trend curves of bifacial MWCNT/2-PSC and SWCNT-PSC under 1 sun front side irradiance and different rear side irradiance.

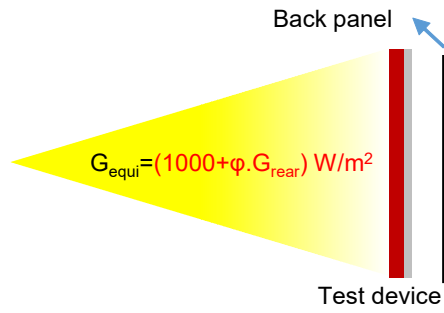

**Fig. S15** The indoor electrical characterization described in IEC TS 60904-1-2: single light source method.

**Table S4** The bifacial power output ( $PO_{bi}$ ) of SWCNT/1-PSC under natural reflection and artificial reflection, respectively.

|       | $V_{oc}$<br>[V] | $J_{sc}$<br>[mA cm <sup>-2</sup> ] | FF<br>[%] | $PO_{bi}$<br>[mW cm <sup>-2</sup> ] | Reflection type       |
|-------|-----------------|------------------------------------|-----------|-------------------------------------|-----------------------|
| SWCNT | 1.131           | 28.3                               | 76.9      | 24.6                                | Natural reflection    |
| SWCNT | 1.136           | 43.6                               | 69.4      | 34.3                                | Artificial reflection |

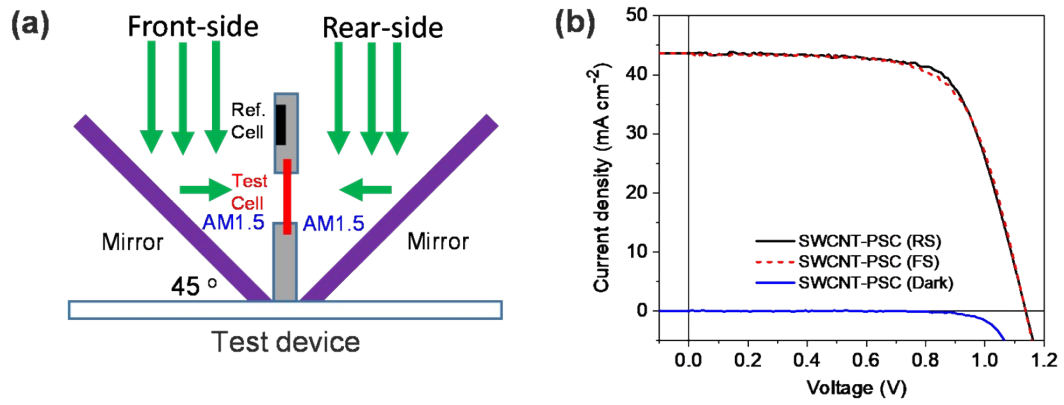

**Fig. S16** (a) The indoor electrical characterization described in IEC TS 60904-1-2: double light source method. (b) *J-V* curves of bifacial SWCNT-PSCs illuminated from front side (100 mW cm<sup>-2</sup>) and rear side (100 mW cm<sup>-2</sup>) simultaneously.

**Table S5** PV performance parameters of SWCNT-PSCs illuminated from front side ( $100 \text{ mW cm}^{-2}$ ) and rear side ( $100 \text{ mW cm}^{-2}$ ) simultaneously.

|       | $V_{oc}$<br>[V] | $J_{sc}$<br>[ $\text{mA cm}^{-2}$ ] | FF<br>[%] | PCE<br>[ $\text{mW cm}^{-2}$ ] | Scan direction |
|-------|-----------------|-------------------------------------|-----------|--------------------------------|----------------|
| SMCNT | 1.138           | 43.7                                | 69.4      | 34.5                           | RS             |
|       | 1.138           | 43.7                                | 67.5      | 33.5                           | FS             |

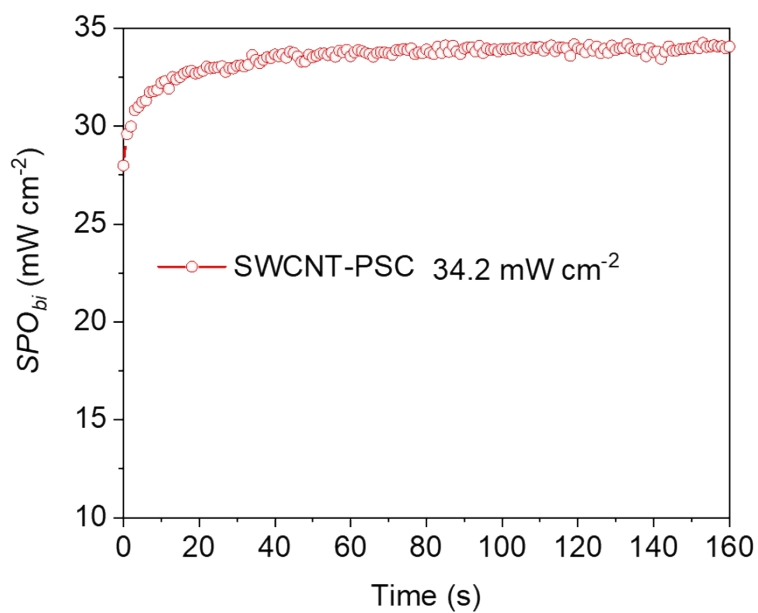

**Fig. S17**  $SPO_{bi}$  of SWCNT-PSC illuminated from front side ( $100 \text{ mW cm}^{-2}$ ) and rear side ( $100 \text{ mW cm}^{-2}$ ) simultaneously.



## Reference

1. T. Feurer, F. Fu, T. P. Weiss, E. Avancini, J. Löckinger, S. Buecheler, A. N. Tiwari, *Thin Solid Films*, 2019, **670**, 34.
